# Supplementary material for: Detection of carbapenem-resistant Klebsiella pneumoniae on the basis of matrix-assisted laser desorption ionization time-of-flight mass spectrometry by using supervised machine learning approach
Source: PubMed Central journal article supplement (PMC7004327; doi:10.1371/journal.pone.0228459), 2020-02-06

Original gel images contained in the manuscript's Figure 3.

M: The 1-kb DNA ladder.

X: Lanes not included in the manuscript's Fig. 3.

S: The strain #36 was used as the standard strain and included in every experiment as a control.

Date of each run was shown above.

KODAK 1D Image Analysis Software (v. 3.6) was used to capture the images.

20180302

M **36** X X **18 19 20** X

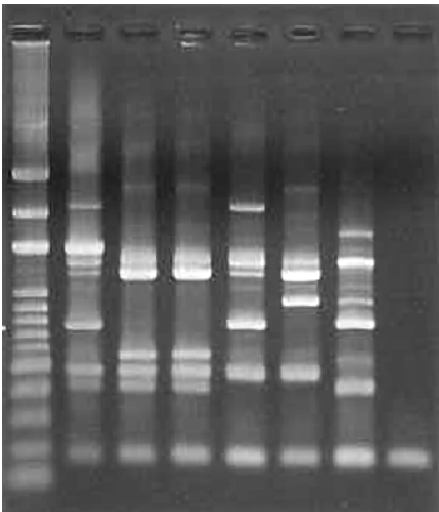

20180306

M **S** **5 8 9 11** X **2 3 4 21** X **17 31 40** X X

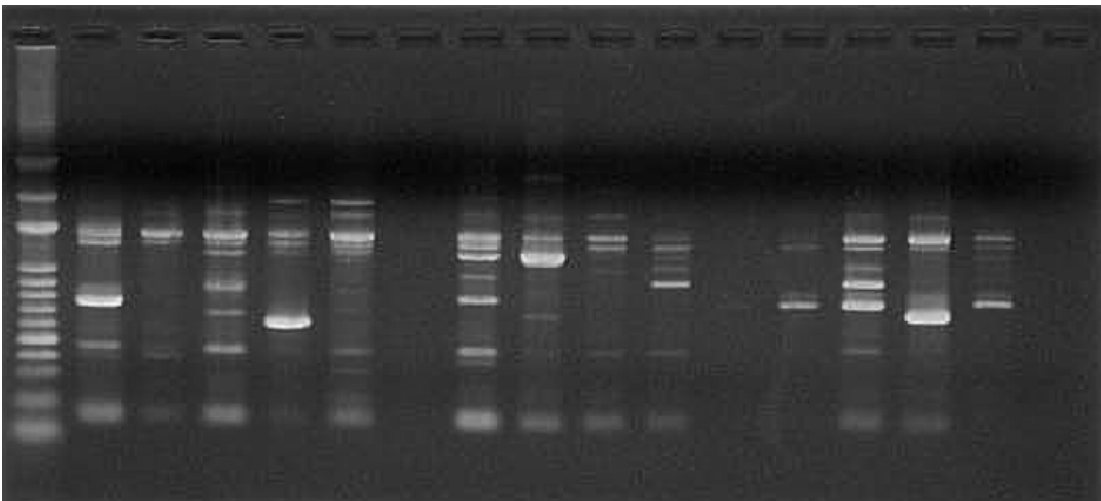

20180312

M **S** 1 7 10 13 14 15 X X X X 24 26 29 16 22

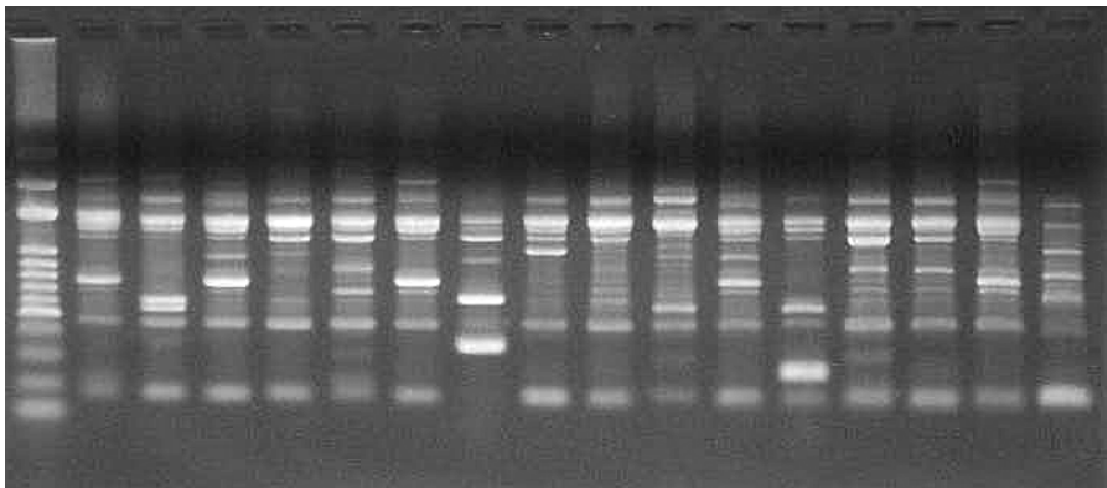

20180314

M **S** X X X 23 25 27 X X X 30 X X X 28 X

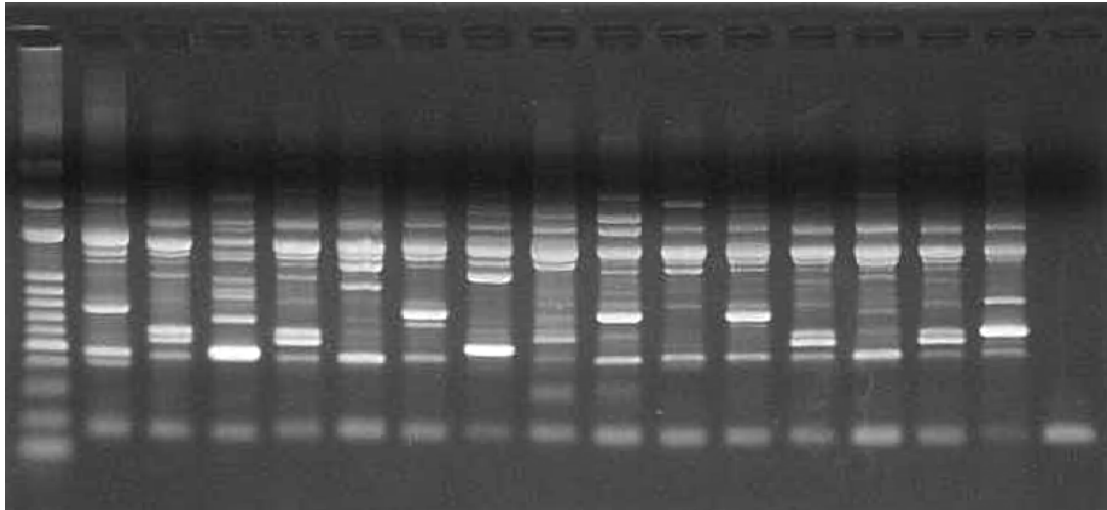

20180319

M **S** X X 33 X X X X 41 X X X X X X X

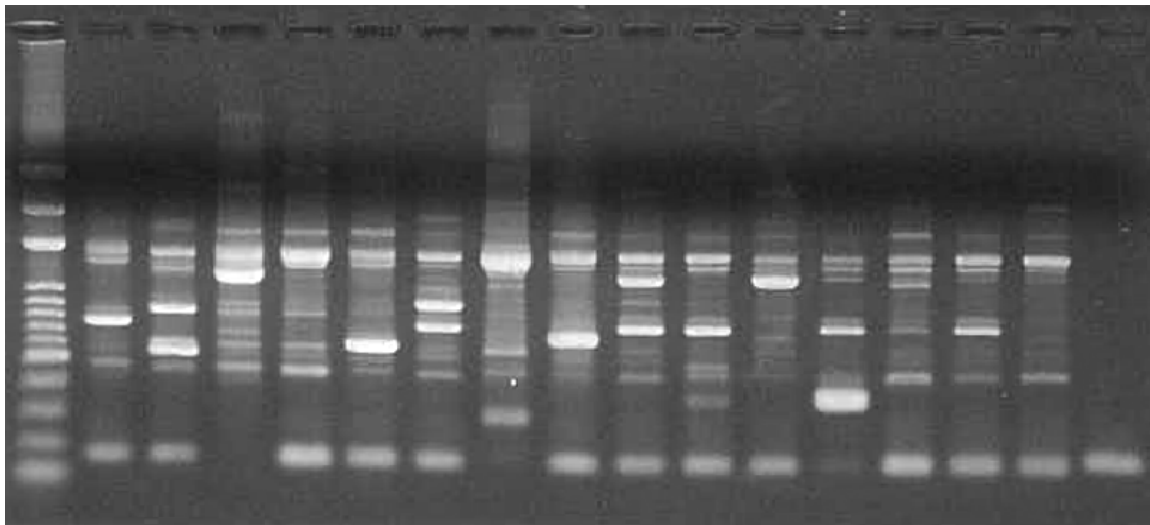

20180321

M **S** 39 X X X X X

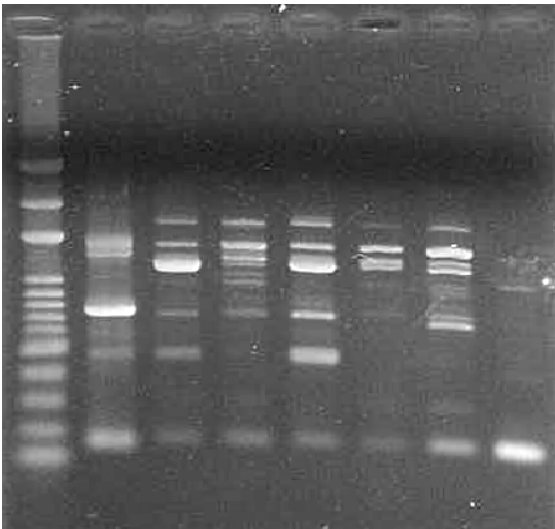

20180322

M **S** 12 32 34 37 35 38 42 43 45 44 46 X X X X

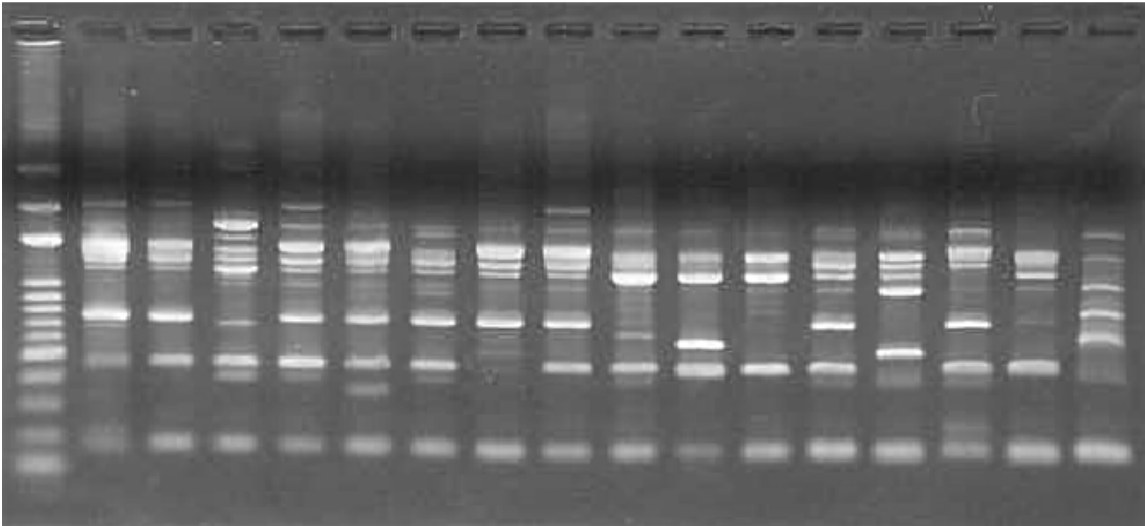

20180419

M **S** X 6 X X X X X X X X X X X X

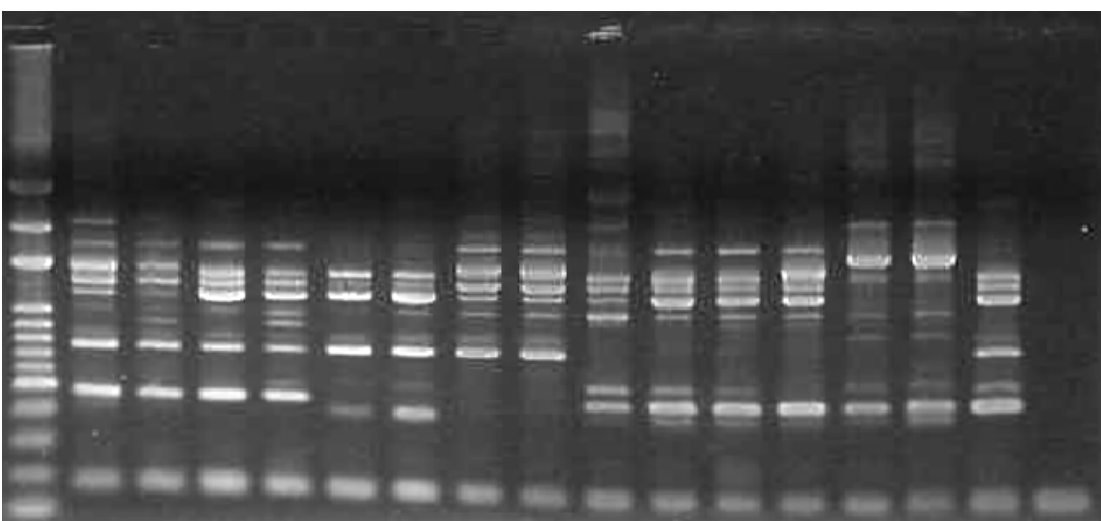

Supplement: pone.0228459.s001.pdf [file pone.0228459.s001.pdf]
